# Supplementary material for: Novel Self-Forming Nanosized DDS Particles for BNCT: Utilizing A Hydrophobic Boron Cluster and Its Molecular Glue Effect
Source: MDPI journal article supplement (doi:10.3390/cells11203307), 2022-10-21
Supplement: s1 [file s1]

# Novel Self-forming Nanosized DDS Particles for BNCT: Utilizing A Hydrophobic Boron Cluster and its Molecular Glue Effect

Abdul Basith Fithroni<sup>1, 2</sup>, Kazuko Kobayashi<sup>3</sup>, Hirotaka Uji<sup>4</sup>, Manabu Ishimoto<sup>5</sup>, Masaru Akehi<sup>3</sup>, Takashi Ohtsuki<sup>1</sup>, and Eiji Matsuura<sup>2, 3, 6, \*</sup>

<sup>1</sup> Department of Interdisciplinary Science and Engineering in Health Systems, Okayama University, 700-8530, Okayama, Japan

<sup>2</sup> Department of Cell Chemistry, Graduate School of Medicine, Dentistry, and Pharmaceutical Sciences, Okayama University, 700-8558, Okayama, Japan

<sup>3</sup> Collaborative Research Center for OMIC, Graduate School of Medicine, Dentistry, and Pharmaceutical Sciences, Okayama University, 700-8558, Okayama, Japan

<sup>4</sup> Department of Material Chemistry, Graduate School of Engineering, Kyoto University, 615-8510, Kyoto, Japan

<sup>5</sup> Fukushima SiC Applied Engineering Inc. 979-0513, Naraha-machi, Japan

<sup>6</sup> Neutron Therapy Research Center (NTRC), Okayama University, 2-5-1 Shikata-cho, Kita-ku, 700-8558, Okayama, Japan

\* Correspondence: eijimatu@md.okayama-u.ac.jp (E.M.); Tel.: +81-86-235-7402 (E.M.)

## List of contents

**Figure S1.** Features of the particles in each preparatory process for the AB-Lac particles loaded with diC12-Carb.

**Figure S2.** Transmission electron microscopy (TEM) images of the B compound-loaded AB-Lac particles.

**Figure S3.** *In vitro* 4T1 cell uptake of B amount (number) by incubating BPA or the AB-Lac particles loaded with *o*-carborane.

**Table S1.** Cytotoxicity of the AB-Lac particles loaded with carborane isomer or *o*-carborane alkylated derivative.

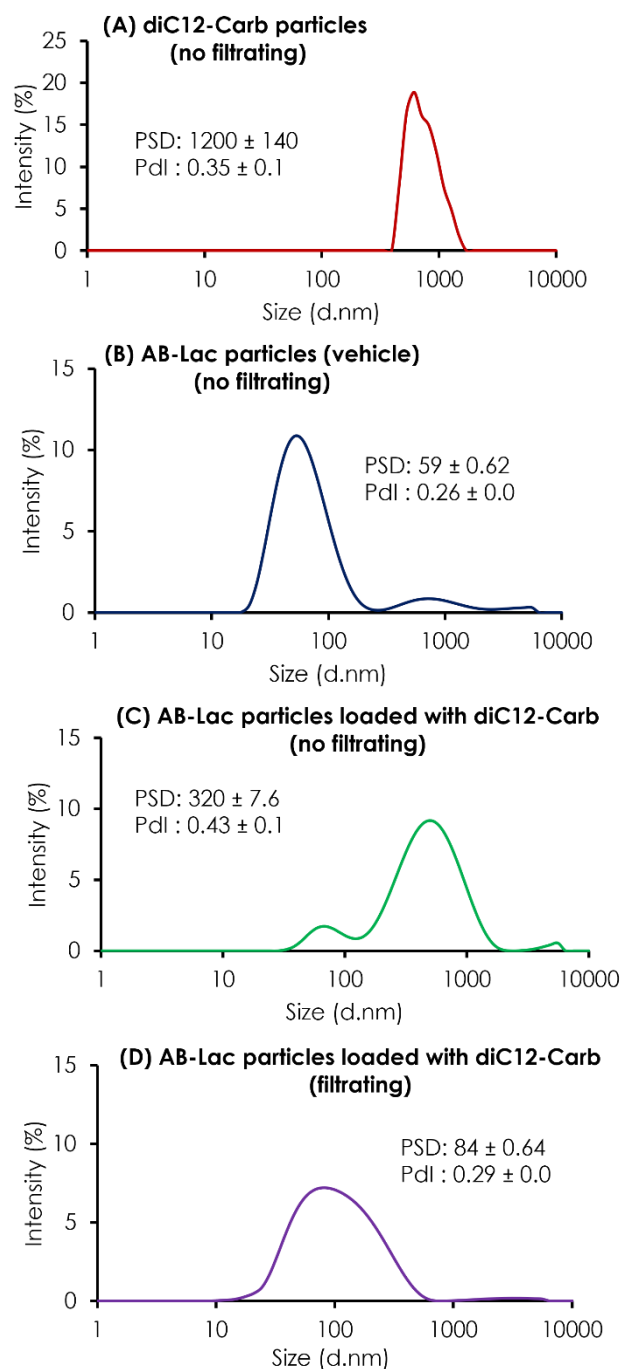

**Figure S1.** Features of the particles in each preparatory process for the AB-Lac particles loaded with diC12-Carb. Self-formed particles of diC12-Carb (without the AB-Lac polymers), after the passing through PD-10 but no filtrating (A), the AB-Lac particles (vehicle), after the passing through PD-10 but no filtrating (B), and the AB-Lac particles loaded with diC12-Carb, after passing through PD-10 but no filtrating (C), or the AB-Lac particles loaded with diC12-Carb, after the passing through PD-10 and filtrating (D). The filtration was performed after passing through the PD-10 column using 0.2  $\mu\text{m}$  and 0.1  $\mu\text{m}$  filters. The PSD and PDI are represented as mean  $\pm$  S.D. ( $n=3$ ). The **panels A-C** revealed a polydisperse pattern after the passing through the PD-10 column but no filtrating, large sized particles (aggregates) remained. Moreover, the data (**panel A**) also revealed that diC12-carb may form larger particles (aggregates) by themselves so that only a small amount of B was incorporated in the AB-Lac particles.

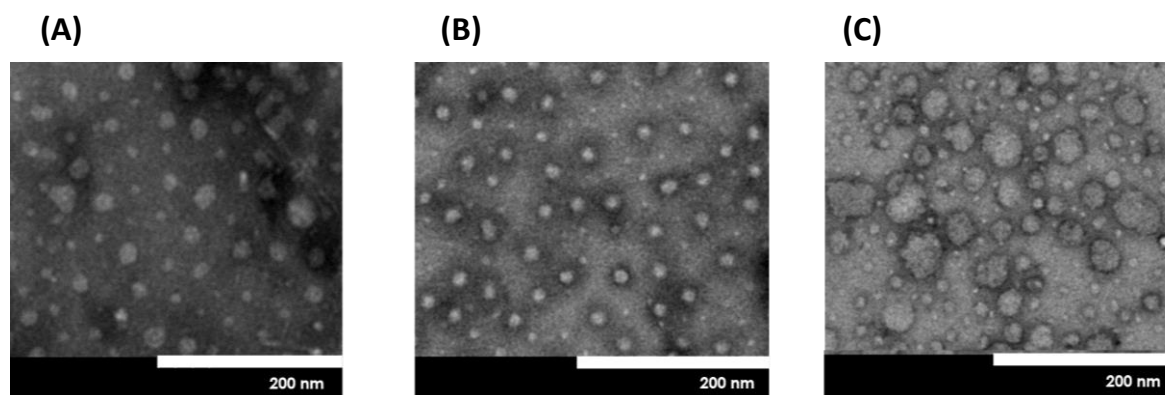

**Figure S2.** Transmission electron microscopy (TEM) images of the B compound-loaded AB-Lac particles. The AB-Lac particles (vehicle) (A), those loaded with *o*-carborane (B), or with diC6-Carb (C). The TEM images were obtained at an accelerated voltage, 80 kV, and magnification was 10,000x. These images confirmed that the PSD and PdI of the AB-Lac particles (vehicle) were almost like that of the particles loaded with *o*-carborane. The image also revealed that the particles loaded with diC6-Carb (C) were larger than others (A and B).

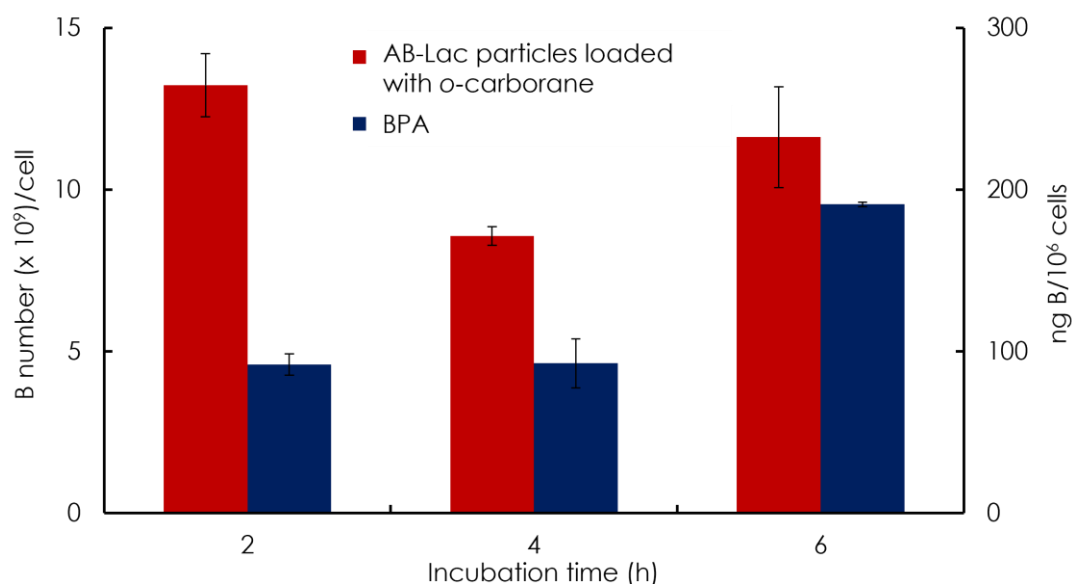

**Figure S3.** *In vitro* 4T1 cell uptake of B number (amount) by incubating BPA or the AB-Lac particles loaded with *o*-carborane. Time-dependent *in vitro* 4T1 cell uptake of B number was detected at 2, 4, and 6 hr, by incubating with BPA or the AB-Lac particles loaded with *o*-carborane (at 2 mM B equivalent). Data are expressed as mean  $\pm$  SEM (n=3). Overall, the results showed that cell uptake of B from the AB-Lac particles loaded with *o*-carborane was higher than that of BPA. The AB-Lac particles loaded with *o*-carborane are taken up by any cancer cell lines probably by endocytosis. Conversely, the BPA is actively taken up by their L-amino acid transporter-1 (LAT-1) which is overexpressed in cancer cells.

**Table S1.** Cytotoxicity of the AB-Lac particles loaded with carborane isomer or *o*-carborane alkylated derivative to the 4T1 cells.

| Carborane isomer/<br><i>o</i> -carborane derivative | Cell viability (%) at |           |           |           |
|-----------------------------------------------------|-----------------------|-----------|-----------|-----------|
|                                                     | 25 ppm                | 50 ppm    | 100 ppm   | 250 ppm   |
| AB-Lac particles loaded with                        |                       |           |           |           |
| <i>o</i> -Carborane                                 | 130 ± 17              | 100 ± 4.6 | 99 ± 11   | 99 ± 8.0  |
| <i>m</i> -Carborane                                 | 110 ± 14              | 97 ± 7.3  | 100 ± 5.1 | 110 ± 6.9 |
| diC1-Carb                                           | 120 ± 7.3             | 110 ± 11  | 100 ± 8.9 | 93 ± 5.7  |
| diC6-Carb                                           | 100 ± 3.2             | 97 ± 3.5  | 98 ± 2.7  | 95 ± 15   |

The cell viability was assayed by the CCK-8 kit, according to the kit's instructions. Data are expressed as mean ± SEM (n=4). The results showed no cytotoxicity at lower than 250 ppm.
